# Supplementary material for: Dissecting the Supramolecular Dispersion of Fullerenes by Proteins/Peptides: Amino Acid Ranking and Driving Forces for Binding to C60
Source: MDPI journal article supplement (doi:10.3390/ijms222111567), 2021-10-26
Supplement: s1 [file s1]

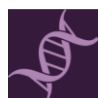

# Dissecting the Supramolecular Dispersion of Fullerenes by Proteins/Peptides: Amino Acid Ranking and Driving Forces for Binding to C<sub>60</sub>

Tainah Dorina Marforio<sup>1,\*</sup>, Alessandro Calza<sup>1</sup>, Edoardo Jun Mattioli<sup>1</sup>, Francesco Zerbetto<sup>1</sup> and Matteo Calvaresi<sup>1,\*</sup>

<sup>1</sup> Dipartimento di Chimica “Giacomo Ciamician”, Alma Mater Studiorum - Università di Bologna, Bologna 40126, Italy

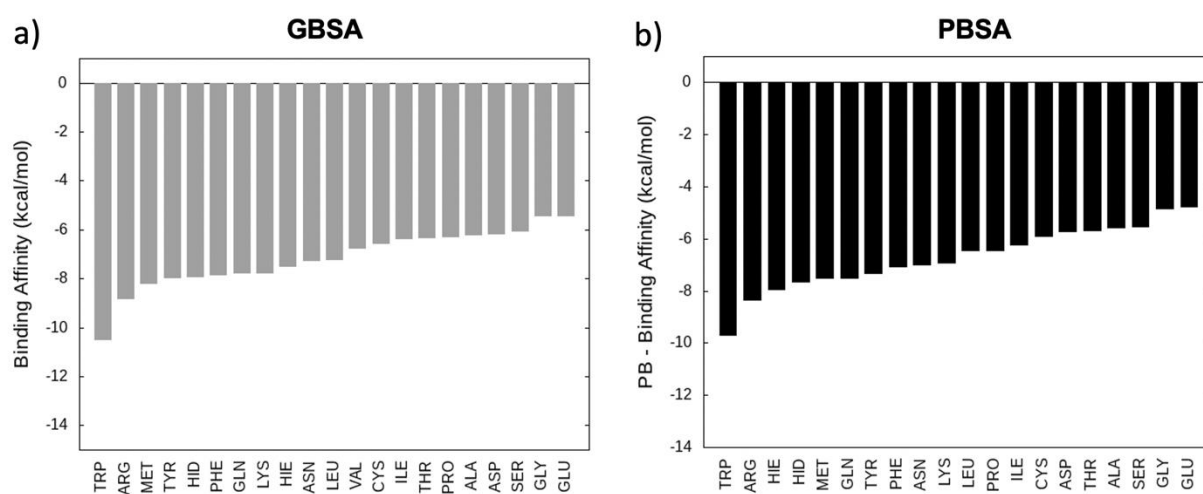

**Figure S1.** Binding energy between amino acid and C<sub>60</sub> calculated by a) MM/GBSA and b) MM/PBSA for the twenty proteinogenic amino acids.

TRP@C<sub>60</sub>

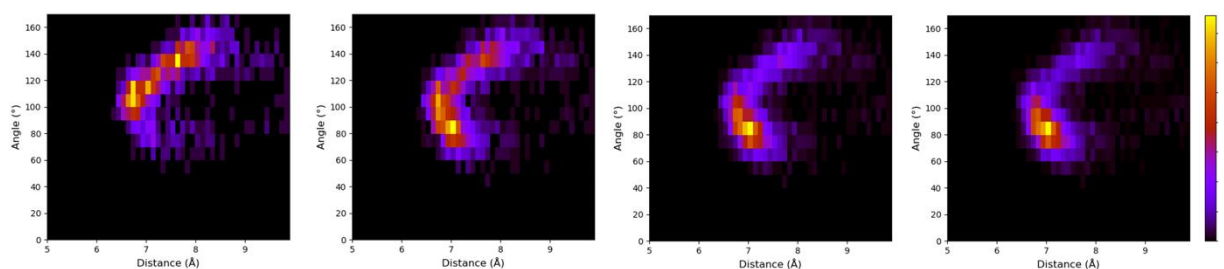

ARG@C<sub>60</sub>

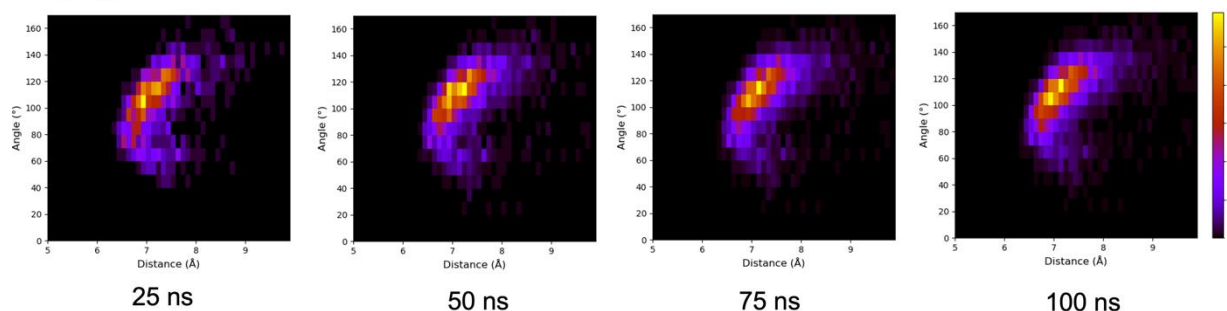

**Figure S2.** Convergence of the Trp@C<sub>60</sub> (top) and Arg@C<sub>60</sub> (bottom) FES as a function of the sampling time.
